# Supplementary material
Source: PubMed Central journal article supplement (PMC2597674)
Supplement: NIHMS67900-supplement-1.pdf [file NIHMS67900-supplement-1.pdf]

## Supplementary Methods

**Fly strains.** The *zld*<sup>294</sup> and *zld*<sup>681</sup> alleles were generated by imprecise excision of the P{RS3}<sup>24</sup> element UM-8171-3 located in 18F2 (Flybase, Szeged stock center) using a  $\Delta$ 2,3 source on the *CyO* chromosome (gift from J. Treisman). These were balanced over *FM7c-ftz-lacZ* (gift from S. Roth). Germline clones were induced in *zld*<sup>294</sup> *FRT 19A* / *y w sn P{mini w+, ovo*<sup>D1-26}25 *FRT*<sup>19A</sup>, *hsFLP122* (see below) second or third instar larvae by the FLP-FRT technique<sup>26</sup>. Virgin females were collected and mated to either *yw*, *FM7/Y*, or *FM7c-ftz-lacZ/Y* (to identify the zygotic genotype with respect to *zld*). Escapers (*zld*<sup>+</sup> germ-line clone embryos) varied between experiments (1 to 10%). To rescue the *zld* phenotype, one copy of the *otu-zld* transgene on chromosome II (see below) was present in germ-line clones.</sup>

**Confirmation of *zld* null alleles.** The exact insertion site of UM-8171-3 was confirmed by sequencing the PCR product of genomic DNA using primers covering the 3' LTR of the P-element and genomic sequences from -1186 to -1162 upstream of the CG12701 RB start site (Flybase). The P-element inserted between -660 and -661. Deletion breakpoints of *zld*<sup>294</sup> and *zld*<sup>681</sup> were determined by genomic PCR analysis and sequencing of the PCR product using primers outside of the deleted region. *zld*<sup>294</sup> deletes sequences -1270 to +1376 and *zld*<sup>681</sup> deletes sequences from -660 to +2250 and leaves part of the P-element. Nucleotide numbering is according to the *Drosophila melanogaster* X chromosome sequence (release v5.1).

**Construction of the *ovoD FRT*<sup>19A</sup> chromosome.** We made the *ovoD FRT*<sup>19A</sup> stock by transposition of *P{mini w+, ovo*<sup>D1}25 onto *y w sn FRT*<sup>19A</sup>, *hsFLP122*. Briefly, males of genotype *y w sn FRT*<sup>19A</sup>, *hsFLP122/Y*; +/- *CyO*,  $\Delta$ 2-3; *FRT*<sup>82B</sup> *ovo*<sup>D1-18</sup>/*Sb*<sup>1</sup> were crossed to *C(1)DX*, *y*<sup>1</sup> *w*<sup>1</sup> *f*<sup>1</sup>/*Y* females. Individual male offspring that were *w*<sup>+</sup> *Cy*<sup>+</sup> *Sb* (genotype *y w sn FRT*<sup>19A</sup>, *hsFLP122* \*; \*/+; *Sb*<sup>1</sup> \*/+, where \* represents potential *P{mini w+, ovo*<sup>D1} insertions) were crossed to *C(1)DX*, *y*<sup>1</sup> *w*<sup>1</sup> *f*<sup>1</sup>/*Y* females. Insertions onto the X chromosome were identified as lines in which the *w*<sup>+</sup> was transmitted to all the sons and to no daughters. These chromosomes were maintained as *y w sn P{mini w+, ovo*<sup>D1} *FRT*<sup>19A</sup>, *hsFLP122/Y* and *C(1)DX*, *y*<sup>1</sup> *w*<sup>1</sup> *f*<sup>1</sup>/*Y* females. To test for penetrance of the *ovoD* insertion, and to confirm that the *FRT*<sup>19A</sup> or *hsFLP122* elements were not inadvertently mobilized, we crossed the *y w sn P{mini w+, ovo*<sup>D1} *FRT*<sup>19A</sup>, *hsFLP122* males to *y w* and *y w FRT*<sup>19A</sup> females at 25°C. We subjected a brood from each of these crosses (24-48 hr old larvae) to a heat shock at 37°C</sup></sup></sup></sup>

for 1 Hr, while other broods were not heat shocked. Female offspring were then assayed for fertility and egg laying. We selected a line (4.1) in which  $y w sn P\{mini w+, ovo^{D1}\} FRT^{19A}$ ,  $hsFLP122/y w$ , either plus or minus heat shock, showed complete sterility and laid almost no eggs, while the  $y w sn P\{mini w+, ovo^{D1}\} FRT^{19A}$ ,  $hsFLP122/y w FRT^{19A}$  showed almost complete sterility in the absence of heat shock, but showed good fertility upon heat shock. The male offspring from these fertile females were all  $w sn^+$ , indicating they contained the  $y w FRT^{19A}$  and not the  $y w sn P\{mini w+, ovo^{D1}\} FRT^{19A}$ ,  $hsFLP122$  chromosome, as would be expected if the  $P\{ovoD\}$  were dominantly blocking female germline development.

***zld* rescue construct.** The *zld* rescue construct was made by subcloning the full-length *zld* coding region +642 to +6345 relative to the RB +1 start site into the *EcoRI* site of the **pCOG** plasmid, which lies between the *ovarian tumor* promoter and the *K10* 3'UTR<sup>17</sup> (gift from C. Navarro). Full length *zld* was prepared by PCR from genomic DNA (Clontech), cloned into the **pCR2.1-TOPO vector** (Invitrogen), and verified by sequencing.

**Site-directed mutagenesis.** The following *zen* promoter fragments were subcloned into the *EcoRI* site of the **pCaSpeR*hsp43-lacZ*** transformation vector (gift from M. Frasch): two tandem copies of the 91 bp fragment (Fig. 1a in upper case) prepared by PCR of subcloned *zen* genomic DNA, two copies of a mutated version of the 91 bp fragment whereby the base substitutions shown in Fig. 1a (in purple) were introduced by PCR site-directed mutagenesis.

***in situ* hybridization.** Embryos were hybridized with digoxigenin-UTP (Roche Biochemicals) RNA probes synthesized from cloned cDNA sequences, or in the case of miR-309, primary transcript sequences spanning the cluster<sup>22</sup>. *lacZ* staining indicated embryos that harbored the *FM7-ftz-lacZ* chromosome and were thus  $MZ^+ zld$ . Stained embryos were mounted in Aquamount (Polysciences), or embedded in araldite (Polysciences). After hybridization, embryos were stained with DAPI (Sigma) to determine mitotic-cycle. Embryos were visualized by fluorescence microscopy using a Nikon FX-A microscope and by Nomarski optics using a Zeiss Axiophot microscope.

**Antibody staining.** Dilution of antibodies was as follows: mouse  $\alpha$ -Nrt (Developmental Studies Hybridoma Bank) 1/50; rabbit  $\alpha$ -Slam (gift from R. Lehmann) 1/200; rat  $\alpha$ -Dorsal 1/50; rabbit  $\alpha$ -Vasa 1/500. F-actin and DNA were visualized by TRITC- labeled phalloidin (Sigma) and Hoechst 33258 (Sigma), respectively. Embryos were viewed by fluorescence microscopy using a Nikon FX-A microscope for whole embryo views, or an Improvion Yokogawa CSU-10 spinning disk confocal system for grazing and sectional views. Images

were prepared using Velocity, ImageJ (Rasband, W.S., ImageJ, U. S. National Institutes of Health, Bethesda, Maryland, USA, <http://rsb.info.nih.gov/ij/>, 1997-2008), and Adobe Photoshop software.

**Yeast one-hybrid assay.** The yeast one-hybrid screen was done using the Matchmaker One-Hybrid System (Clontech). The *zen* 91-bp fragment with four TAGteam sites was amplified by PCR and cloned into the *EcoRI* site of the target-reporter vectors (**pLaci** and **pHis1-1**). The TAGteam reporter vectors were integrated into the yeast YM4271 strain to generate the yeast reporter strain YM4271[*TAG-lacZ*, *TAG-his*]. The YM4271[*TAG-lacZ*, *TAG-his*] reporter strain was used to screen a 0-6 hours embryonic cDNA library fused to the Gal4 activation domain<sup>27</sup>. All 121 His3 positive clones from the first screen were subjected to  $\beta$ -Galactosidase activity assays for the second screening, and the final 34 positive clones were sequenced to identify the candidates.

**Transient transfection assays.** The wild-type and mutated 91 bp *zen* promoter fragments described above were subcloned into the *EcoRI* site of the **pCaSpeR reporter vector<sup>28</sup> (gift from A. Laughon). The full-length *zld* coding region was cloned between the *KpnI* and *XhoI* sites of **pMT/V5-His B** expression vector (Invitrogen). *Drosophila* S2 cells were grown at 28° C in Schneider's medium (Invitrogen) supplemented with 10% FCS. 3X10<sup>6</sup> cells were transfected using Effectene Transfection reagent (Qiagen) with a 250 ng plasmid DNA mix containing 100 ng reporter plasmid, 50 ng plasmid constitutively expressing firefly *luciferase*, expression plasmid as indicated in Fig. 1E and the plasmid **pcDNA3** to bring the total amount of DNA to 250 ng. The expression of Zld protein was induced 24 hours post-transfection by adding 0.5 mM CuSO<sub>4</sub> directly to the medium. The cells were lysed after 24 hours and the  $\beta$ -Galactosidase and Luciferase activities were assayed (Promega) following the manufacturer's protocols. The fold activation was calculated as a ratio of the normalized (for transfection efficiency) *lacZ* activity in cells treated with 0.5 mM CuSO<sub>4</sub> and untreated cells.**

**DNA binding assays.** Electrophoretic mobility shift assays were performed as previously described<sup>9</sup> using affinity purified C-terminal part of the Zld protein containing four zinc fingers (amino acids 1240-1470) fused to GST (GST-Zld-C) and 26 bp oligonucleotide probes overlapping TAGteam sites from the *zen* promoter, except that EDTA was omitted from the binding buffer and ZnSO<sub>4</sub> was added to 10  $\mu$ M. The incubation reactions contained 0.1 ng of <sup>32</sup>P labeled oligonucleotides and varying amounts of recombinant GST-Zld-C protein (see

Fig. 1G for nucleotide sequences).

**Microarray analysis.** Total RNA was extracted from three independent collections of 1-2 hr *yw* and *M zld* embryos by TRIzol (Invitrogen). A portion of the collected embryos was fixed and stained with DAPI; 90% were in nuclear cycles 8 to13. cDNA was prepared using the GeneChip® HT One-Cycle cDNA Synthesis Kit (Manufactured by Invitrogen for Affymetrix) and labeled with the BioArray™ HighYield™ RNA Transcript Labeling Kit (Enzo). Labeled probes were hybridized to Affymetrix *Drosophila* Genome 2 arrays and processed by a GeneChip Fluidics Station 400. Data were acquired by a GeneChip® Scanner 3000 and processed/normalized by Affymetrix GeneChip Operating Software (GCOS). Genes were identified as present when at least two of the three replicates had present (P) assignment ( $p < 0.05$ ). Two-tailed t-test analysis was performed on the data from the three biological replicates.
