# Supplementary material
Source: PubMed Central journal article supplement (PMC2597674)
Supplement: NIHMS67900-supplement-3.pdf [file NIHMS67900-supplement-3.pdf]

**Supplementary Table 1. Genes down-regulated in the absence of *zld*.**

| Gene     | symbol          | FC    | p value | Gene     | symbol          | foldΔ | p value | Gene     | symbol            | FC  | p value |
|----------|-----------------|-------|---------|----------|-----------------|-------|---------|----------|-------------------|-----|---------|
| CG7960*  | <i>bro</i>      | 106.0 | 0.00940 | CG7271*  |                 | 5.7   | 0.01100 | CG12194  |                   | 2.4 | 0.00070 |
| CG14915* |                 | 101.3 | 0.01480 | CG17725  | <i>Pepck</i>    | 5.6   | 0.01760 | CG5093   | <i>Doc3</i>       | 2.4 | 0.03110 |
| CG1502*  | <i>tsq</i>      | 86.5  | 0.01900 | CG3839*  | <i>l(1)sc</i>   | 5.5   | 0.00510 | CG10962  |                   | 2.4 | 0.00250 |
| CG12205* | <i>Bsq25A</i>   | 79.5  | 0.01580 | CG13695  | <i>gk</i>       | 5.3   | 0.02660 | CG2047   | <i>ftz</i>        | 2.4 | 0.00230 |
| CG14014* |                 | 70.5  | 0.04580 | CG3827*  | <i>sc</i>       | 4.9   | 0.00060 | CG13085  |                   | 2.4 | 0.03560 |
| CG14317* |                 | 65.4  | 0.01110 | CG3758*  | <i>esg</i>      | 4.8   | 0.00800 | CG16721  |                   | 2.4 | 0.00480 |
| CG6885*  |                 | 58.6  | 0.01630 | CG13333  |                 | 4.7   | 0.05300 | CG3961   |                   | 2.3 | 0.03880 |
| CG13712* |                 | 52.1  | 0.01660 | CG14937  |                 | 4.6   | 0.01580 | CG1849*  | <i>run</i>        | 2.3 | 0.02120 |
| CG8960*  |                 | 47.4  | 0.00860 | CG16813  |                 | 4.3   | 0.00100 | CG13252  |                   | 2.3 | 0.00420 |
| CG18269* |                 | 43.6  | 0.00260 | CG1480   | <i>bnk</i>      | 4.0   | 0.00280 | CG1378*  | <i>tll</i>        | 2.3 | 0.03120 |
| CG31695  | <i>scw</i>      | 34.8  | 0.00500 | CG7343   | <i>btsz</i>     | 3.7   | 0.03870 | CG30184  |                   | 2.3 | 0.05040 |
| CG11582  | <i>tsg like</i> | 30.9  | 0.01890 | CG2961   | <i>lpod</i>     | 3.7   | 0.00790 | CG4210   |                   | 2.3 | 0.00540 |
| CG17962  | <i>frs</i>      | 27.2  | 0.01310 | CG1046*  | <i>zen</i>      | 3.6   | 0.01040 | CG2145   |                   | 2.3 | 0.04000 |
| CG15634* |                 | 21.5  | 0.01790 | CG16815  |                 | 3.6   | 0.00410 | CG1623   |                   | 2.3 | 0.02720 |
| CG13713* |                 | 19.4  | 0.00280 | CG5201   | <i>Dad</i>      | 3.5   | 0.01080 | CG18584  | <i>koi</i>        | 2.3 | 0.04990 |
| CG31253  |                 | 19.3  | 0.03070 | CG33070  | <i>Sxl</i>      | 3.5   | 0.02850 | CG17209  |                   | 2.2 | 0.00120 |
| CG7178   | <i>wupA</i>     | 19.0  | 0.01360 | CG7508   | <i>ato</i>      | 3.4   | 0.00520 | CG11275  |                   | 2.2 | 0.01100 |
| CG7204*  | <i>Neu2</i>     | 18.2  | 0.01220 | CG8066   |                 | 3.4   | 0.00350 | CG14135  |                   | 2.2 | 0.03950 |
| CG10393* | <i>amos</i>     | 17.1  | 0.00620 | CG31743  |                 | 3.1   | 0.04080 | CG12283  | <i>kek1</i>       | 2.2 | 0.02260 |
| CG6868   | <i>tld</i>      | 15.9  | 0.02390 | CG12370  |                 | 3.0   | 0.00110 | CG31677  |                   | 2.2 | 0.00200 |
| CG13000* |                 | 15.4  | 0.00480 | CG6494*  | <i>h</i>        | 2.9   | 0.02630 | CG16712  |                   | 2.2 | 0.04990 |
| CG15876  |                 | 15.1  | 0.01050 | CG11430  | <i>olf186-F</i> | 2.9   | 0.00500 | CG15480* |                   | 2.2 | 0.01340 |
| CG1944   | <i>Cyp4p2</i>   | 15.0  | 0.00460 | CG4702   |                 | 2.9   | 0.04750 | CG18446  |                   | 2.1 | 0.00300 |
| CG13716  |                 | 14.9  | 0.00900 | CG5133   | <i>Doc1</i>     | 2.9   | 0.04500 | CG13427* |                   | 2.1 | 0.04940 |
| CG31607  |                 | 14.9  | 0.02970 | CG12179  |                 | 2.9   | 0.02260 | CG2187   |                   | 2.1 | 0.03250 |
| CG7428*  | <i>halo</i>     | 14.5  | 0.00770 | CG16778  | <i>Tkr</i>      | 2.8   | 0.04080 | CG15479  |                   | 2.1 | 0.04970 |
| CG10564  | <i>Ac78C</i>    | 13.6  | 0.04070 | CG5455   |                 | 2.8   | 0.00190 | CG18408  | <i>rexin</i>      | 2.1 | 0.04440 |
| CG13711* |                 | 13.2  | 0.04420 | CG1368   |                 | 2.8   | 0.04280 | CG4429   | <i>Rbp2</i>       | 2.1 | 0.02850 |
| CG15382* |                 | 10.7  | 0.00540 | CG3973   |                 | 2.7   | 0.00110 | CG9927   | <i>Art2</i>       | 2.1 | 0.03250 |
| CG7052   | <i>TepII</i>    | 10.2  | 0.00540 | CG3767   | <i>Jhl-26</i>   | 2.7   | 0.00080 | CG2328   | <i>eve</i>        | 2.1 | 0.00680 |
| CG1048*  | <i>zen2</i>     | 10.2  | 0.02740 | CG12011  |                 | 2.7   | 0.03420 | CG3096*  | <i>Brd</i>        | 2.1 | 0.02350 |
| CG4922*  | <i>sala</i>     | 9.5   | 0.03520 | CG31672  |                 | 2.6   | 0.00310 | CG17364  |                   | 2.1 | 0.04840 |
| CG13454  |                 | 9.4   | 0.01900 | CG32564  |                 | 2.6   | 0.05280 | CG1515   | <i>l(1) G0155</i> | 2.0 | 0.00020 |
| CG14426* | <i>nullo</i>    | 9.2   | 0.01100 | CG14112* | <i>SNCF</i>     | 2.5   | 0.02340 | CG6936   | <i>mth</i>        | 2.0 | 0.01950 |
| CG3796   | <i>ac</i>       | 8.4   | 0.01080 | CG11833  |                 | 2.5   | 0.03550 | CG9914   |                   | 2.0 | 0.00070 |
| CG17957* | <i>sry-a</i>    | 8.0   | 0.00830 | CG14427* |                 | 2.5   | 0.02610 | CG13609  |                   | 2.0 | 0.01330 |
| CG1641*  | <i>sisA</i>     | 7.2   | 0.01430 | CG5993   | <i>os</i>       | 2.5   | 0.04200 | CG9506   | <i>slam</i>       | 2.0 | 0.01410 |
| CG32680  | <i>spri</i>     | 6.5   | 0.01720 | CG12875  |                 | 2.4   | 0.00820 | CG18522  |                   | 2.0 | 0.02730 |
| CG8050*  | <i>Cys</i>      | 6.1   | 0.03930 | CG13049  |                 | 2.4   | 0.01470 | CG15848  | <i>Scp1</i>       | 2.0 | 0.00180 |
| G9885    | <i>dpp</i>      | 5.7   | 0.03530 | CG6058   | <i>Ald</i>      | 2.4   | 0.03640 | CG12701  | <i>zld</i>        | 4.5 | 0.00010 |



**Supplementary Table 2. (Continued)**

| ≥ 2 fold      | 0.2  | 0.4 | 0.6 | 0.8 | 1  | 1.2 | 1.4  | 1.6 | 1.8 | 2  | FC  |
|---------------|------|-----|-----|-----|----|-----|------|-----|-----|----|-----|
| <i>Doc3</i>   | x    |     |     |     |    |     |      |     |     |    | 2.4 |
| CG12194       |      |     |     |     | xx |     |      |     |     |    | 2.4 |
| <i>Ald</i>    | x    |     |     |     | x  |     |      |     |     |    | 2.4 |
| CG13049       |      |     |     |     | x  |     | x    |     |     |    | 2.4 |
| CG12875       |      |     |     |     |    | x   |      | x   |     | x  | 2.4 |
| <i>os</i>     |      |     |     |     |    |     |      |     | x   | xx | 2.5 |
| CG14427       | xx   |     |     |     |    |     |      |     |     |    | 2.5 |
| CG11833       |      |     |     |     | xx |     |      |     |     |    | 2.5 |
| <i>SNCF</i>   | xx   |     |     |     |    |     |      |     |     |    | 2.5 |
| CG32564       |      |     |     |     | x  |     |      |     |     |    | 2.6 |
| CG12011       |      |     |     | x   |    |     |      |     |     |    | 2.7 |
| <i>Jhl-26</i> | x    |     |     |     |    |     | x    |     |     |    | 2.7 |
| CG3973        |      |     |     | x   |    |     |      |     |     |    | 2.7 |
| CG1368        |      |     |     |     |    |     |      |     |     |    | 2.8 |
| CG5455        |      |     |     |     |    |     |      |     |     |    | 2.8 |
| <i>Tkr</i>    |      |     |     |     |    |     |      |     |     |    | 2.8 |
| CG12179       |      |     |     |     |    |     |      |     |     |    | 2.9 |
| <i>Doc1</i>   | x    |     |     |     |    |     |      |     |     |    | 2.9 |
| CG4702        |      |     | x   | x   |    |     |      |     |     |    | 2.9 |
| <i>h</i>      |      |     |     |     |    |     |      |     |     |    | 2.9 |
| CG12370       |      |     |     |     |    |     |      |     |     |    | 3.0 |
| CG8066        |      |     |     |     |    |     |      |     |     | x  | 3.4 |
| <i>ato</i>    |      | xx  |     |     |    |     |      |     |     |    | 3.4 |
| <i>Sxl</i>    |      |     |     |     |    |     |      |     |     |    | 3.5 |
| <i>Dad</i>    |      |     |     |     |    |     |      |     |     |    | 3.5 |
| CG16815       | x    |     | x   |     |    |     |      |     |     |    | 3.6 |
| <i>zen</i>    | x    | x   |     |     |    |     | xxxx |     |     |    | 3.6 |
| <i>btsz</i>   | xx   |     |     |     |    |     |      |     |     |    | 3.7 |
| <i>bnk</i>    | xx   | x   |     |     |    |     |      |     |     |    | 4.0 |
| CG16813       |      | xx  |     |     |    |     |      |     |     |    | 4.3 |
| CG14937       | xxx  |     |     |     |    |     |      |     |     |    | 4.6 |
| CG13333       | xx   |     |     |     |    |     |      |     |     |    | 4.7 |
| <i>esg</i>    |      | x   | x   |     |    |     |      |     |     |    | 4.8 |
| <i>sc</i>     | xxxx |     |     |     |    |     |      |     |     |    | 4.9 |
| <i>gk</i>     |      | x   |     |     | x  | x   |      |     |     |    | 5.3 |
| <i>L(1)sc</i> | xx   | x   |     |     |    |     |      |     |     |    | 5.5 |
| <i>Pepck</i>  |      |     |     |     |    |     |      |     |     |    | 5.6 |
| CG7271        | xx   |     |     |     |    |     |      |     |     |    | 5.7 |

| ≥ 2 fold        | 0.2 | 0.4 | 0.6 | 0.8 | 1  | 1.2 | 1.4 | 1.6 | 1.8 | 2  | FC    |
|-----------------|-----|-----|-----|-----|----|-----|-----|-----|-----|----|-------|
| <i>dpp</i>      | xx  | x   |     |     |    |     |     |     |     | xx | 5.7   |
| <i>Cys</i>      |     |     |     |     |    | x   | x   |     |     |    | 6.1   |
| <i>spri</i>     |     |     |     |     |    |     |     |     |     |    | 6.5   |
| <i>sisA</i>     | xx  | xx  |     | xx  |    |     |     |     |     |    | 7.2   |
| <i>sry-a</i>    | xx  | x   |     |     |    | xx  |     |     |     |    | 8.0   |
| CG3796          |     | x   |     |     |    |     |     |     |     |    | 8.4   |
| <i>nullo</i>    |     |     |     |     |    |     |     |     |     |    | 9.2   |
| CG13454         | x   |     |     |     |    |     |     |     |     |    | 9.4   |
| <i>sala</i>     | xxx |     |     |     |    |     |     |     |     |    | 9.5   |
| <i>zen2</i>     | x   |     | xx  | x   |    |     |     |     |     |    | 10.2  |
| <i>TepII</i>    |     |     |     |     |    |     |     |     |     |    | 10.2  |
| CG15382         | xx  |     |     |     |    |     |     |     |     |    | 10.7  |
| CG13711         |     | xx  |     |     |    |     |     |     |     |    | 13.2  |
| <i>Ac78C</i>    |     |     |     |     |    |     |     |     |     |    | 13.6  |
| <i>halo</i>     | xx  |     |     |     |    |     |     |     |     |    | 14.5  |
| CG31607         |     |     |     |     |    |     |     |     |     | x  | 14.9  |
| CG13716         |     |     |     |     |    |     |     |     |     |    | 14.9  |
| <i>Cyp4p2</i>   |     |     |     |     |    |     |     |     |     |    | 15.0  |
| CG15876         | xx  |     |     |     |    |     |     |     | x   | x  | 15.1  |
| CG13000         | x   |     |     |     |    | x   |     |     |     |    | 15.4  |
| <i>tld</i>      | x   | x   | x   |     |    |     |     | x   |     |    | 15.9  |
| <i>Neu2</i>     |     |     |     | x   | x  |     |     |     |     |    | 18.2  |
| <i>wupA</i>     |     |     |     |     |    |     |     |     |     |    | 19.0  |
| CG31253         | xx  |     |     |     |    |     |     |     |     |    | 19.3  |
| CG13713         | xx  |     |     |     | x  | x   |     |     |     |    | 19.4  |
| CG15634         | xx  |     |     | x   |    |     |     |     |     |    | 21.5  |
| <i>frs</i>      | xx  |     |     |     |    |     |     |     |     |    | 27.2  |
| <i>tsg like</i> | xx  |     |     |     |    |     |     |     |     |    | 30.9  |
| CG18269         | xx  |     |     |     |    | x   |     |     |     |    | 43.6  |
| CG8960          |     |     |     |     |    |     |     |     |     |    | 47.4  |
| CG13712         |     | x   |     |     |    |     |     |     |     |    | 52.1  |
| CG6885          |     |     |     |     |    |     |     |     |     |    | 58.6  |
| CG14317         | xx  | xxx |     |     |    |     |     |     |     |    | 65.4  |
| CG14014         | x   |     |     |     | xx |     |     |     |     |    | 70.5  |
| <i>Bsq25A</i>   | xx  |     |     |     |    |     |     |     |     |    | 79.5  |
| <i>tsq</i>      | xxx | x   |     |     |    |     |     |     |     |    | 86.5  |
| CG14915         | xx  |     |     |     | x  |     |     |     |     |    | 101.3 |

**Table S1. Genes down-regulated in the absence of *zld*.** Fold change (FC) was determined as the ratio of wt mean/*M zld* mean from three biological replicas. Genes with a fold change > 2 and a p-value < 0.05 were defined as significantly down-regulated. These genes were evenly distributed amongst the chromosome arms. Annotated genes are color coded by function: sex determination in green, cellular blastoderm formation in orange, and embryonic patterning in pink. The asterisks\* denote genes that are also on the De Renzis *et al.*<sup>6</sup> (2007) list of early zygotic genes.

**Table S2. Distribution of TAGteam sites near transcription start sites.** TAGteam sites (CAGGTAG, TAGGTAG, CAGGCAG, CAGGTAA) were located in 200 bp intervals upstream of the transcription start site (up to 2 Kb) using FlyEnhancer.org. Genes from two categories were analyzed: genes down-regulated at least two fold in *M zld* embryos (in yellow), and genes absent in 1-2 hour embryos, but present in post-blastoderm genes<sup>5</sup> (in gray). Note that 43% of the down-regulated genes have at least one TAGteam site within 200 bp upstream of their start sites compared to 5% of the post-blastoderm genes<sup>5</sup> ( $p=1 \times 10^{-6}$ ; Fisher exact test). The genes down-regulated > 5 fold tend to have clusters of TAGteam sites within 200 bp of the start site.
